# Supplementary material for: Spectral dynamics of shift current in ferroelectric semiconductor SbSI
Source: PubMed Central journal article supplement — Proc Natl Acad Sci U S A. 2019 Jan 22;116(6):1929–33. doi: 10.1073/pnas.1802427116 (PMC6369763; doi:10.1073/pnas.1802427116), 2019-01-22
Supplement: pnas.1802427116.sapp.pdf [file pnas.1802427116.sapp.pdf]

# PNAS

[www.pnas.org](http://www.pnas.org)

## Supplementary Information for

Spectral dynamics of shift-current in ferroelectric semiconductor SbSI

M. Sotome\*, M. Nakamura, J. Fujioka, M. Ogino, Y. Kaneko, T. Morimoto,  
Y. Zhang, M. Kawasaki, N. Nagaosa, Y. Tokura and N. Ogawa

\*Masato Sotome

Email: [masato.sotome@riken.jp](mailto:masato.sotome@riken.jp)

### **This PDF file includes:**

Supplementary Information Text and figure

Effective THz generation length and shift distance

THz waveforms under varying excitation photon energy

References for Supplementary Information

## Supplementary Information Text

### Effective THz generation length and shift distance

The dynamics of shift current  $J_{\text{shift}}(t)$  was calculated by convoluting the incident laser intensity  $I(z, t)$  and the derivative of one-photon charge-shift  $e \frac{d}{dt} r_{\text{shift}}(t)$ . Integrating along the depth ( $z$ ) direction, the shift current reads

$$J_{\text{shift}}(t) = \frac{1}{\hbar\omega_{\text{exc}}} \int_{-\infty}^{\infty} e \frac{d}{dt'} r_{\text{shift}}(t') I(z=0, t-t') dt'. \quad [\text{S1}]$$

After Fourier transformation, the THz pulse emitted outside the sample is

$$E_{\text{shift}}^{\text{emit}}(\omega) = -t_{\text{THz}}^{\text{sam}} t_{\text{exc}}^{\text{sam}} \frac{e}{\hbar\omega_{\text{exc}}} \omega^2 r_{\text{shift}}(\omega) I(\omega), \quad [\text{S2}]$$

where  $t_{\text{exc}}^{\text{sam}}$  and  $t_{\text{THz}}^{\text{sam}}$  are the transmission coefficients of the sample for excitation light and generated THz wave, respectively.

For the case of the reference ZnTe(110) crystal, the electric field induced by photoexcitation can be expressed as

$$\begin{aligned} E_{\text{OR}}(\omega) &= -\omega^2 \int_0^d P_{\text{OR}}(\omega) \exp[i(n(\omega) + n_g)\omega - \alpha(\omega_{\text{exc}})z] dz \\ &= -\omega^2 L_{\text{OR}}(\omega) P_{\text{OR}}(\omega), \quad [\text{S3}] \end{aligned}$$

where  $P_{\text{OR}}$  is the nonlinear optical polarization [1],

$$P_{\text{OR}}(\omega) = \frac{\chi^{(2)}}{n^{\text{ref}}(\omega_{\text{exc}})c} I(\omega), \quad [\text{S4}]$$

with the refractive index  $n^{\text{ref}}(\omega_{\text{exc}})$ , speed of light  $c$ , thickness  $d$ , and absorption coefficient at the excitation energy  $\alpha(\omega_{\text{exc}})$ . The effective generation length of optical rectification  $L_{\text{OR}}(\omega)$  comes from the phase matching condition;

$$L_{\text{OR}}(\omega) = \left[ \frac{\exp\left(\frac{i\omega}{c} (n_g + n(\omega))d - \alpha(\omega_{\text{exc}})d\right) - 1}{\frac{i\omega}{c} (n_g + n(\omega)) - \alpha(\omega_{\text{exc}})} \right]. \quad [\text{S5}]$$

By assuming  $\alpha(\omega_{\text{exc}}) = 0$  and the nonlinear optical coefficient  $\chi^{(2)}$  is constant within the laser band-width, we observe, at outside of the sample,

$$E_{\text{OR}}^{\text{emit}}(\omega) = -t_{\text{THz}}^{\text{ref}} t_{\text{exc}}^{\text{ref}} \frac{\chi^{(2)}\omega}{n^{\text{ref}}(\omega_{\text{exc}}) |n_g^{\text{ref}} + n^{\text{ref}}(\omega_{\text{THz}})|} I(\omega)/2. \quad [\text{S6}]$$

Here  $n_g^{\text{ref}}$  is group refractive index ( $n_g^{\text{ref}} = n^{\text{ref}} + \omega_{\text{exc}} \frac{dn^{\text{ref}}}{d\omega_{\text{exc}}}$ ), and 1/2 comes from the symmetry of  $\chi^{(2)}$  tensor of ZnTe.

Using this  $E_{\text{OR}}^{\text{emit}}(\omega)$  as reference, we evaluate the  $r_{\text{shift}}(\omega)$  as

$$r_{\text{shift}}(\omega) = \chi^{(2)} \frac{t_{\text{THz}}^{\text{ref}} t_{\text{opt}}^{\text{ref}}}{t_{\text{THz}}^{\text{sam}} t_{\text{opt}}^{\text{sam}}} \left( \frac{\hbar\omega_{\text{exc}}}{e} \right) \frac{2}{i\omega n_{\text{opt}}^{\text{ref}} |n_g^{\text{ref}} + n_{\text{THz}}^{\text{ref}}|} \frac{E_{\text{shift}}^{\text{emit}}(\omega)}{E_{\text{OR}}^{\text{emit}}(\omega)} \quad [\text{S7}]$$

The inverse Fourier transformation of  $r_{\text{shift}}(\omega)$  gives  $r_{\text{shift}}(t)$ .

The photocurrent spectrum for the in-gap OR (Fig. 2C in the main text) is normalized by the  $L_{\text{OR}}$  assuming that the excitation photon density is constant throughout the sample (negligible photon absorption). In contrast, the shift current spectrum is affected by penetration depth  $\frac{1}{\alpha(\omega_{\text{exc}})}$ . Thus, the appreciable THz intensity and current for the in-gap OR (Fig. 5 in the main text) are due to the integration of weak signals in the extended depth ( $L_{\text{OR}}$ ) in the sample.

### THz waveforms under varying excitation photon energy

Figure S1A and S1B show waveforms and its FFT spectra at 1.5-1.8 eV, and 2.1 eV excitation photon energy. The data for 1.5 to 1.7 eV excitations is expected to be free from photo-absorption, which show similar waveform and spectrum with those for 1.8 eV excitation, where the Urbach tail may extend from the band edge. This result supports that emission of THz wave at 1.8 eV excitation can also be ascribed to the in-gap optical rectification, without the effect of the Urbach absorption. We note that the defect states will not generate the shift current, because the Berry connection is not well defined.

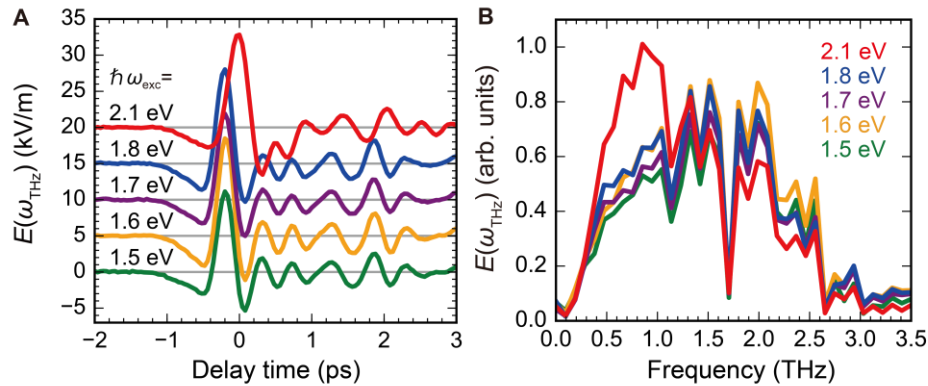

Fig. S1. Excitation photon energy dependence of THz waveforms ( $E_{\text{exc}} \parallel E_{\text{THz}} \parallel c$ , 282 K). (A) THz waveforms (offset for clarity). (B) Absolute amplitude spectra.

### References

1. Schneider A, Neis M, Stillhart M, Ruiz B, Khan RUA, Günter P (2006) Generation of terahertz pulses through optical rectification in organic DAST crystals: theory and experiment. *J Opt Soc Am B* 23:1822-1835.
